# Supplementary material for: Phase-formations of Mg2P2O7–Mn2P2O7mixed pyrophosphates and their desired luminescence abilities
Source: Royal Society of Chemistry journal article supplement (doi:10.1039/d1dt00506e), 2021-01-01
Supplement: d1dt00506e1.pdf [file d1dt00506e1.pdf]

## Supporting information

# Phase-formations of $\text{Mg}_2\text{P}_2\text{O}_7$ - $\text{Mn}_2\text{P}_2\text{O}_7$ mixed pyrophosphates and its desired luminescence abilities

**Donglei Wei,<sup>a,b</sup> Hyo Jin Seo<sup>b\*</sup>**

*<sup>a</sup> School of Electronic and Information Engineering, Changshu Institute of Technology, Changshu,*

*215500, China*

*<sup>b</sup> Department of Physics, Pukyong National University, Busan 608-737, Republic of Korea*

---

\* Corresponding author: [hjseo@pknu.ac.kr](mailto:hjseo@pknu.ac.kr) (Hyo Jin Seo); Tel.: +82

516295568; fax: +82 516295549.

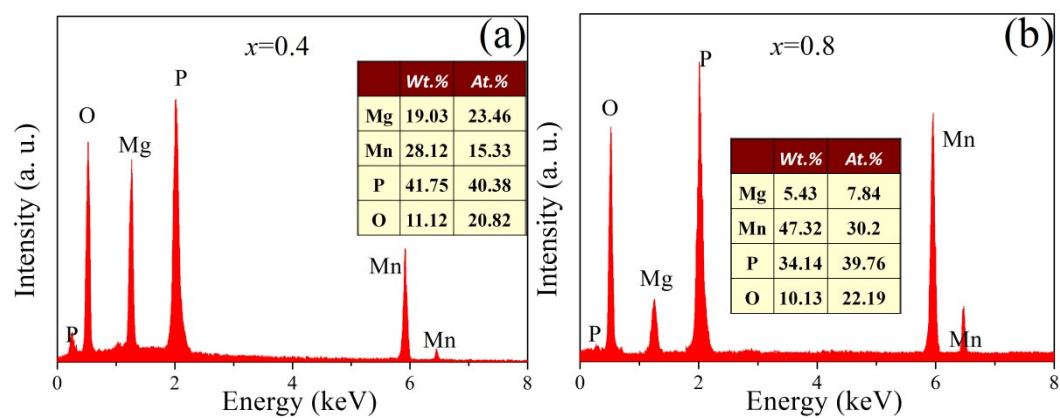

**Figure-S-1** the EDS measurements of  $(\text{Mg}_{1-x}\text{Mn}_x)_2\text{P}_2\text{O}_7$  with  $x=0.4$  (a) and  $x=0.8$  (b).

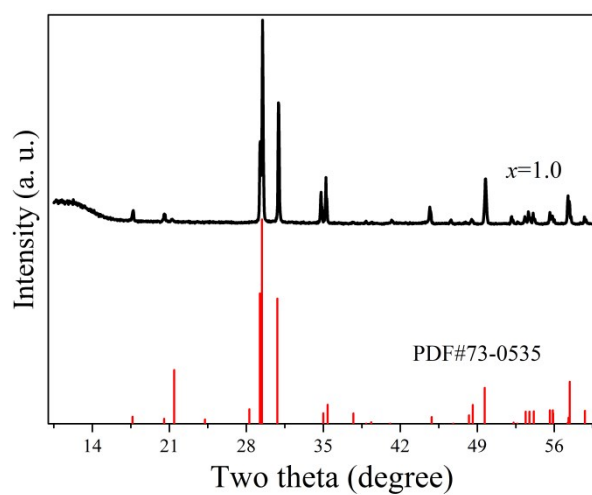

**Figure-S-2** XRD pattern of  $(\text{Mg}_{1-x}\text{Mn}_x)_2\text{P}_2\text{O}_7$  ( $x=1.0$ ) and the standard card PDF# No: 73-0535 ( $\beta\text{-Mg}_2\text{P}_2\text{O}_7$ ).

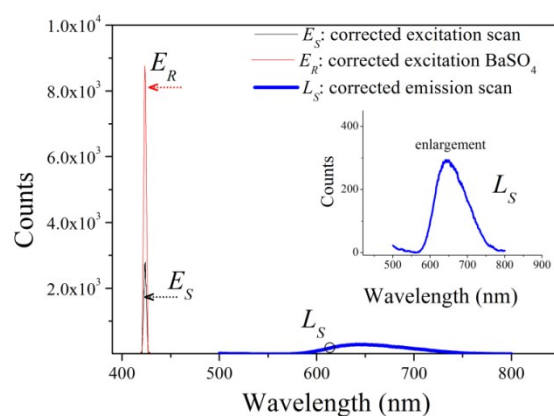

**Figure S-3** The experiments of luminescence quantum efficiency (QE) of  $(\text{Mg}_{1-x}\text{Mn}_x)_2\text{P}_2\text{O}_7$

( $x = 0.15$ ) with the excitation of 420 nm.

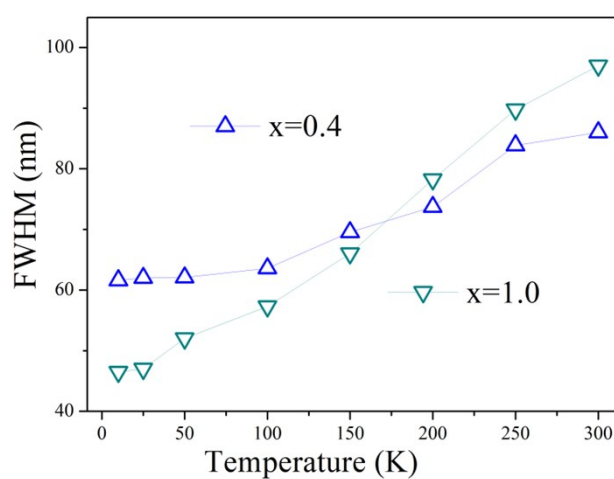

**Figure S-4** the temperature-dependent FWHM (full width at half maximum) of

$(\text{Mg}_{1-x}\text{Mn}_x)_2\text{P}_2\text{O}_7$  with  $x=0.4$  and  $x=0.8$ .

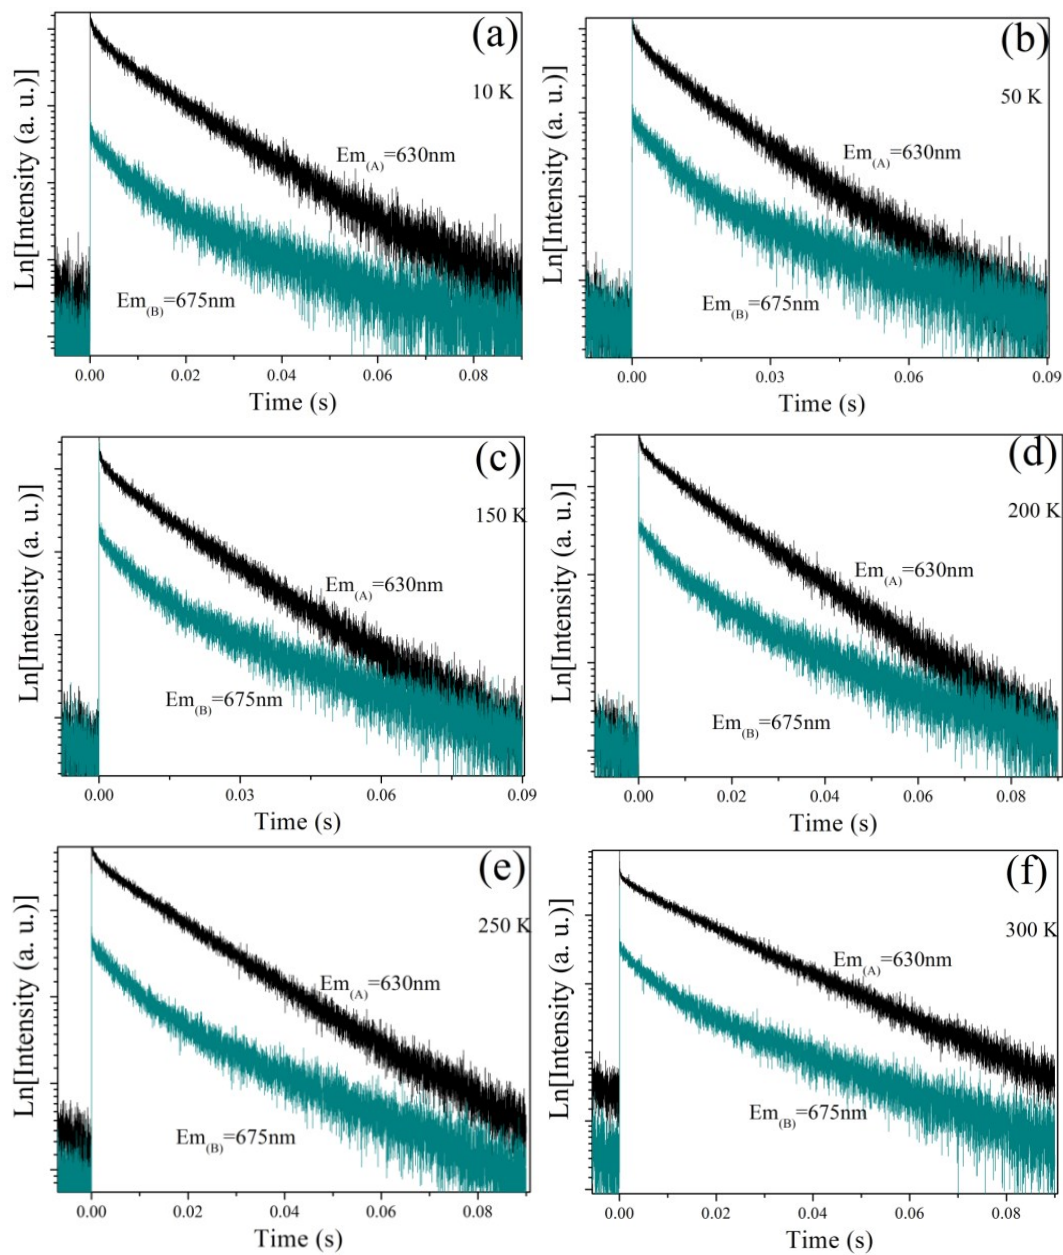

**Figure S-5** the temperature-dependent decay curves of  $(\text{Mg}_{1-x}\text{Mn}_x)_2\text{P}_2\text{O}_7$  with  $(x=0.005)$  by monitoring the luminescence from  $\text{Mn}^{2+}(\text{A})$  and  $\text{Mn}^{2+}(\text{B})$ .

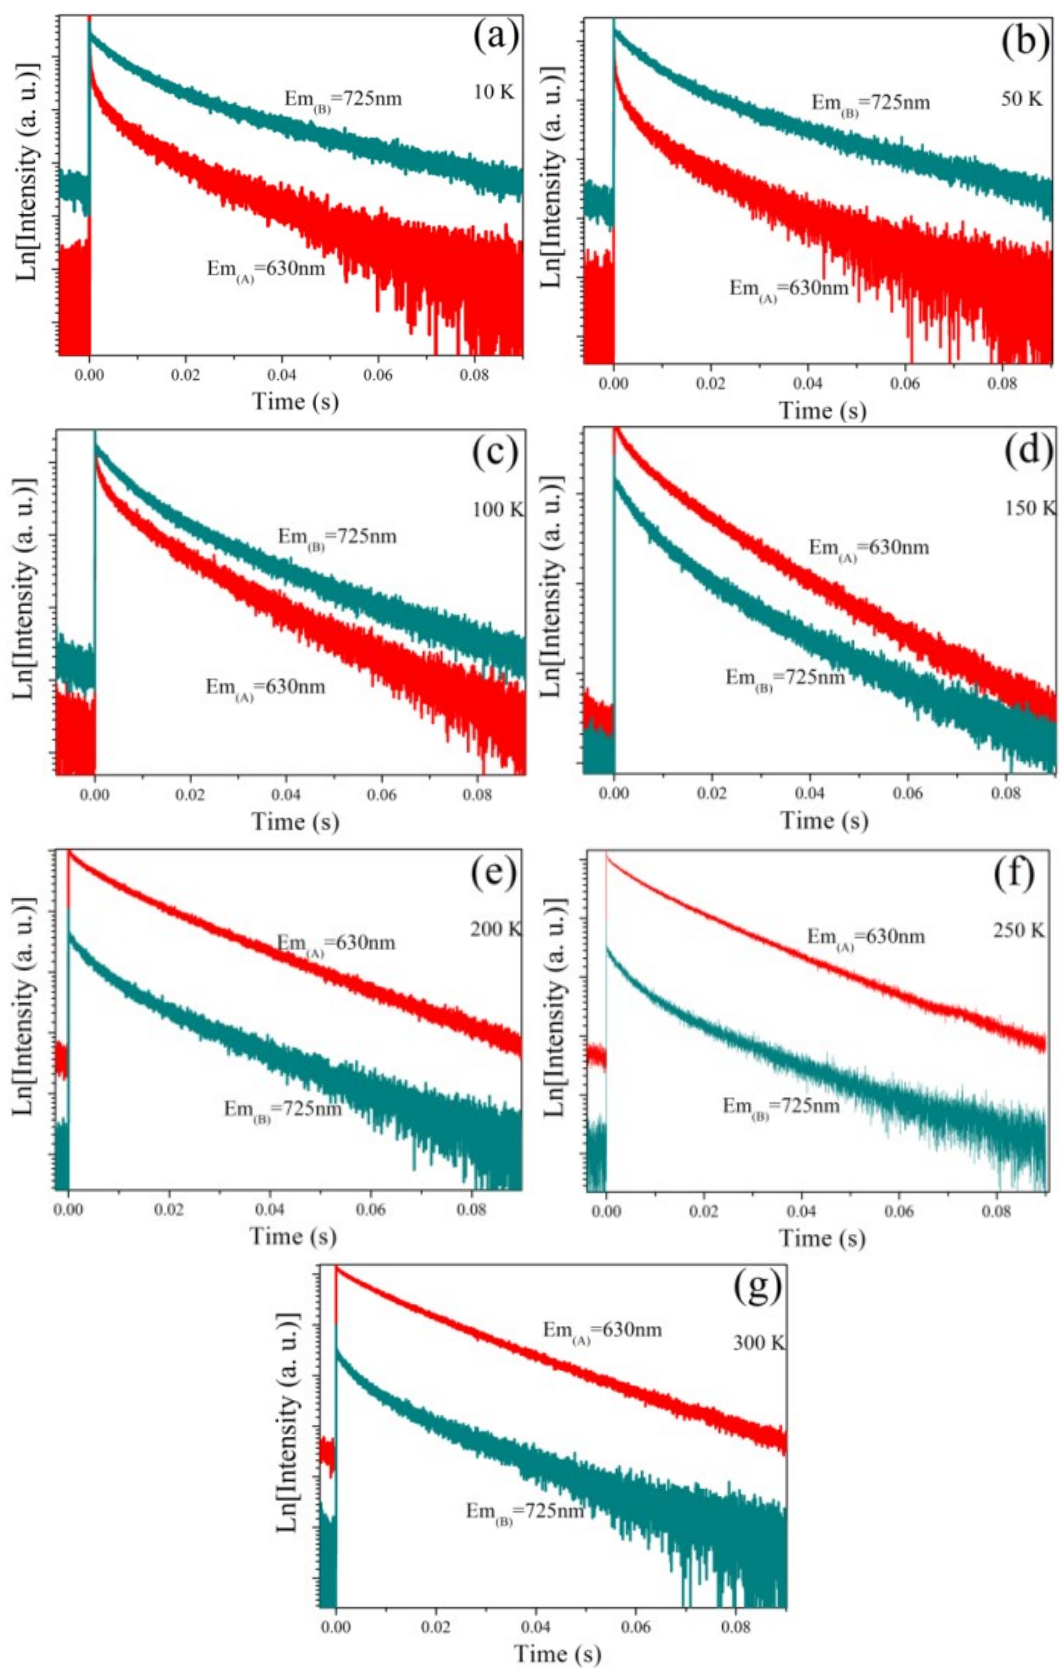

**Figure S-6** the temperature-dependent decay curves of  $(\text{Mg}_{1-x}\text{Mn}_x)_2\text{P}_2\text{O}_7$  with  $(x=0.1)$  by monitoring the luminescence from  $\text{Mn}^{2+}(\text{A})$  and  $\text{Mn}^{2+}(\text{B})$ .

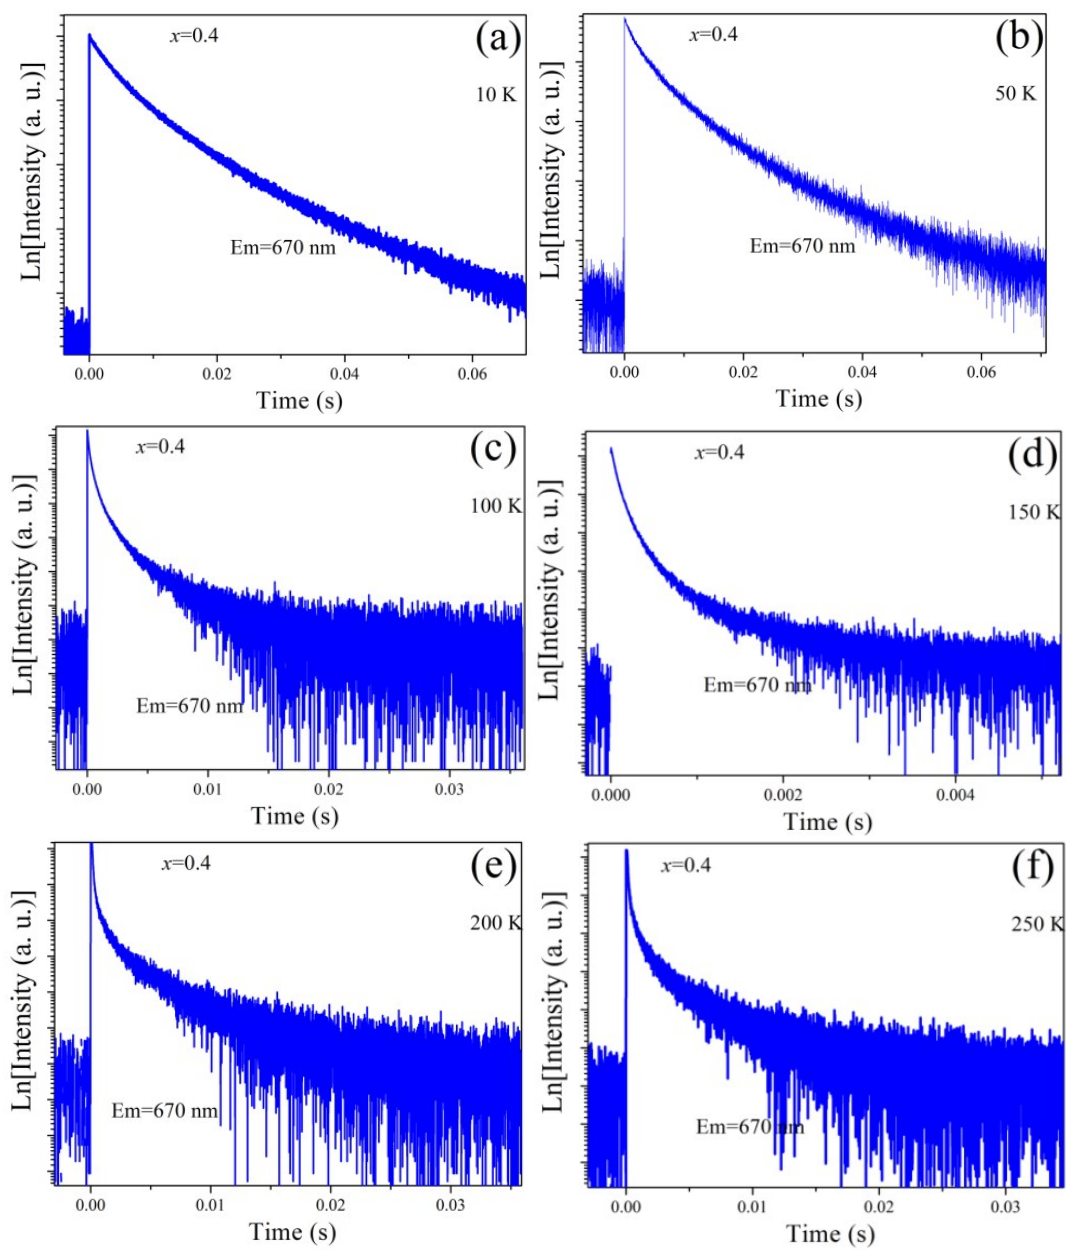

**Figure S-7** the temperature-dependent decay curves of  $(\text{Mg}_{1-x}\text{Mn}_x)_2\text{P}_2\text{O}_7$  with  $(x=0.4)$  by

monitoring the luminescence from  $\text{Mn}^{2+}$ .

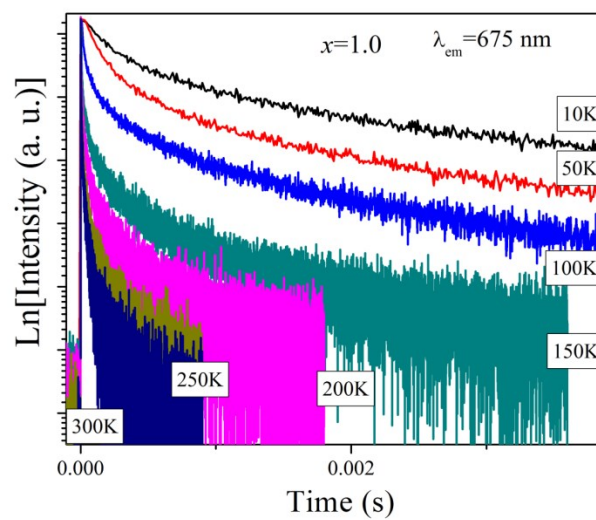

**Figure S-8** the temperature-dependent decay curves of  $(\text{Mg}_{1-x}\text{Mn}_x)_2\text{P}_2\text{O}_7$  with  $(x=1.0)$  by monitoring the luminescence from  $\text{Mn}^{2+}$ .
